# Supplementary material
Source: publisher site journal article supplement (https://www.dovepress.com/article/447469)
Supplement: Supplementary file 1 [file get_supplementary_file.php]

**Supplementary Table 1** Demographics of all participants (*N* = 170).

| Demographic | | N | Percent (%) | M | SD |
| --- | --- | --- | --- | --- | --- |
| Gender | Male | 23 | 13.5 |  |  |
|  | Female | 145 | 85.3 |  |  |
| Nonbinary | 1 | 0.6 |  |  |
| Transgender female | 1 | 0.6 |  |  |
| Age | |  |  | 21 | 3 |
| Ethnicity | White British | 76 | 44.7 |  |  |
| White Irish | 1 | 0.6 |  |  |
| White European | 22 | 12.9 |  |  |
| White American | 1 | 0.6 |  |  |
| Black British | 3 | 1.8 |  |  |
| Asian | 6 | 3.5 |  |  |
| Asian British | 11 | 6.5 |  |  |
| Asian European | 2 | 1.2 |  |  |
| Chinese | 1 | 0.6 |  |  |
| Mixed-race British | 10 | 5.9 |  |  |
| Caribbean | 1 | 0.6 |  |  |
| Middle Eastern | 2 | 1.2 |  |  |
| Other | 1 | 0.6 |  |  |
| Prefer not to say | 3 | 1.8 |  |  |
| Unknown | 30 | 17.6 |  |  |

**Supplementary Table 2** Table showing skewness and kurtosis z-scores for non-normally distributed measures.

| Measure | | *Z*-score skewness | *Z*-score kurtosis |
| --- | --- | --- | --- |
| Sleep Diary | Sleep Latency | 3.33 | 3.20 |
|  | Sleep Efficiency | -2.31 | - |
|  | Sleep Rating | -4.12 | 4.19 |
| Actigraphy | Sleep Efficiency | -1.98 | - |

*Note:* Measures considered non-normally distributed if *z*-scores for skewness and kurtosis were outside the cut-off points of ±1.96 for a small sample and outside ±3.29 for a medium sample.67

**Supplementary Table 3** Table showing minimums, maximums, means, standard deviations, medians, interquartile ranges, and gender differences for questionnaire measures (*N* = 170).

| Measure | Overall | | | | | | Males | | | | | Females | | | | | Trans-gender | | Non-binary | |
| --- | --- | --- | --- | --- | --- | --- | --- | --- | --- | --- | --- | --- | --- | --- | --- | --- | --- | --- | --- | --- |
|  | Min | Max | M | SD | Mdn | IQR | | M | SD | Mdn | IQR | | M | SD | Mdn | IQR | |  | |  |
| Global PSQI | 4.00 | 11.00 | 6.89 | 2.16 | 7.00 | 3.00 | | 9.50 | 1.92 | 10.00 | 4.00 | | 6.20 | 1.66 | 7.00 | 3.00 | | 13 | | 5 |
| PSS | 10.00 | 32.00 | 21.79 | 5.50 | 22.00 | 4.00 | | 26.50 | 4.04 | 25.50 | 7.50 | | 20.53 | 5.24 | 21.00 | 3.00 | | 32 | | 18 |
| Rumination | 2.42 | 4.67 | 3.90 | 0.56 | 4.00 | 0.84 | | 4.08 | 0.36 | 4.00 | 0.66 | | 3.85 | 0.60 | 4.00 | 0.97 | | 4.83 | | 4.67 |
| FFMQ-SF Total | 55.00 | 100.0 | 71.84 | 11.94 | 72.00 | 17.00 | | 71.50 | 11.73 | 74.50 | 21.50 | | 71.93 | 12.40 | 71.00 | 17.00 | | 64 | | 75 |
| Non-judging | 6.00 | 23.00 | 14.37 | 4.87 | 15.00 | 17.00 | | 12.25 | 3.40 | 13.00 | 6.25 | | 14.93 | 5.13 | 16.00 | 9.00 | | 19 | | 20 |
| Non-reactivity | 7.00 | 21.00 | 14.11 | 3.46 | 15.00 | 4.00 | | 15.25 | 5.90 | 16.50 | 11.00 | | 13.80 | 2.73 | 14.00 | 4.00 | | 5 | | 10 |
| Awareness | 6.00 | 24.00 | 13.42 | 3.95 | 13.00 | 5.00 | | 11.50 | 1.91 | 11.00 | 3.50 | | 13.93 | 4.23 | 14.00 | 5.00 | | 17 | | 14 |
| Observing | 9.00 | 20.00 | 13.74 | 3.00 | 13.00 | 3.00 | | 16.50 | 3.51 | 16.50 | 7.00 | | 13.00 | 2.48 | 13.00 | 4.00 | | 8 | | 16 |
| Describing | 10.00 | 25.00 | 16.21 | 4.18 | 15.00 | 5.00 | | 16.00 | 5.42 | 14.00 | 9.00 | | 16.27 | 4.03 | 15.00 | 5.00 | | 15 | | 15 |

*Note:* PSQI = Pittsburgh Sleep Quality Index,63 PSS= Perceived Stress Scale,34Rumination measured by the Rumination Reflection Questionnaire,46FFMQ-SF = Five Facets of Mindfulness Questionnaire Short Form.65

**Supplementary Table 4** Table showing minimums, maximums, means, standard deviations, medians, interquartile ranges, and gender differences for sleep diaries (*N* = 21).

| Measure | Overall | | | | | | Males | | | | | Females | | | | | |
| --- | --- | --- | --- | --- | --- | --- | --- | --- | --- | --- | --- | --- | --- | --- | --- | --- | --- |
|  | Min | Max | M | SD | Mdn | IQR | | M | SD | Mdn | IQR | | M | SD | Mdn | IQR |
| Sleep Latency (mins) | 7.71 | 68.86 | 23.23 | 15.55 | 20.00 | 13.43 | | 20.68 | 9.87 | 21.79 | 18.68 | | 23.90 | 16.96 | 18.57 | 13.43 |
| Sleep Duration (hrs) | 6.39 | 9.06 | 7.49 | 0.79 | 7.26 | 1.22 | | 6.84 | 0.40 | 6.85 | 0.77 | | 7.67 | 0.79 | 7.62 | 1.18 |
| Number of Awakenings | 0.00 | 3.00 | 1.87 | 0.84 | 2.14 | 1.00 | | 1.93 | 1.25 | 2.07 | 2.00 | | 1.85 | 0.75 | 2.14 | 1.00 |
| Sleep Efficiency (%) | 80.82 | 98.20 | 91.74 | 4.69 | 92.38 | 5.02 | | 91.79 | 4.00 | 92.34 | 7.56 | | 91.73 | 4.98 | 92.38 | 4.66 |
| Self-rated Quality | 0.00 | 2.00 | 1.74 | 0.56 | 2.00 | 0.00 | | 2.00 | 0.00 | 2.00 | 0.00 | | 1.67 | 0.62 | 2.00 | 1.00 |

**Supplementary Table 5** Table showing minimums, maximums, means, standard deviations, medians, interquartile ranges, and gender differences for actigraphy (*N* = 23).

| Measure | Overall | | | | | | | | | | | Males | | | | | | | | Females | | | | | | | | |
| --- | --- | --- | --- | --- | --- | --- | --- | --- | --- | --- | --- | --- | --- | --- | --- | --- | --- | --- | --- | --- | --- | --- | --- | --- | --- | --- | --- | --- |
|  | Min | | Max | | M | | SD | | Mdn | | IQR | | M | | SD | | Mdn | | IQR | | M | | SD | | Mdn | | IQR |
| Sleep Duration (hrs) | 3.63 | | 8.21 | | 6.58 | | 1.21 | | 6.48 | | 1.45 | | 5.79 | | 1.71 | | 5.92 | | 3.29 | | 6.79 | | 1.02 | | 6.56 | | 1.81 |
| Number of Activity Periods | 2.14 | | 10.14 | | 6.39 | | 2.28 | | 6.00 | | 3.79 | | 7.16 | | 1.84 | | 7.71 | | 3.23 | | 6.19 | | 2.39 | | 5.50 | | 3.79 |
| Sleep Efficiency (%) | 50.70 | | 91.71 | | 78.91 | | 12.15 | | 83.10 | | 17.60 | | 75.33 | | 14.26 | | 77.74 | | 27.22 | | 79.87 | | 11.88 | | 83.10 | | 16.94 |
|  |  |  | |  | |  | |  | |  | |  | |  | |  | |  | |  | |  | |  | |  | | |
